# Supplementary material
Source: Elsevier journal article supplement (https://www.sciencedirect.com/science/article/pii/S2444382421002340)
Supplement: mmc1 [file S2444382421002340:mmc1.docx]

Material suplementario tabla 1.

Tabla 1a. Análisis multivariado para la detección de cáncer colorrectal y lesión significativa colónica ajustado por solicitud considerada indeterminado y/o apropiada por EPAGE y concentración de hemoglobina fecal.

| Factores de riesgo | Cáncer colorrectal | | | Lesión significativa colónica | | |
| --- | --- | --- | --- | --- | --- | --- |
| Coeficiente β | OR  (95% IC) | *P Value* | Coeficiente β | OR  (95% IC) | *P Value* |
| Edad | 0,009 | 1,009  (0,966-1,054) | 0,688 | 0,020 | 1,020  (0,998 - 1,041) | 0,050 |
| Sexo | 1,067 | 2,907  (0,898 - 9,412) | 0,075 | 0,686 | 1,985  (1,204 - 3,272) | 0,007 |
| IMC | 0,032 | 1,033  (0,924 - 1,154) | 0,570 | 0,051 | 1,052  (0,998 - 1,109) | 0,058 |
| EPAGE I-A | -0,709 | 0,492  (0,103 – 2,363) | 0,376 | 0,695 | 2,004  (0,678 - 5,921) | 0,209 |
| Hb-f | 0,001 | 1,001  (1,001 - 1,002) | < 0,001 | 0,002 | 1,002  (1,002 - 1,003) | < 0,001 |

IMC: Índice masa corporal.

Hb-f: concentración de hemoglobina fecal. Valor cuantitativo µg Hb/g heces

EPAGE I-A: solicitud de colonoscopia considerada como apropiada o indeterminada.

Tabla 1b. Análisis multivariado para la detección de cáncer colorrectal y lesión significativa colónica ajustado por una solicitud considerada apropiada o indeterminada según EPAGE y el valor de la calculadora de riesgo de NA.

| Factores de riesgo | Cáncer colorrectal | | | Lesión significativa colónica | | |
| --- | --- | --- | --- | --- | --- | --- |
| Coeficiente β | OR  (95% IC) | *P Value* | Coeficiente β | OR  (95% IC) | *P Value* |
| IMC | 0,031 | 1,031  (0,921- 1,154) | 0,595 | 0,043 | 1,044  (0,995-1,095) | 0,079 |
| EPAGE I-A | -0,703 | 0,495  (0,100- 2,455) | 0,389 | 0,769 | 2,158  (0,725-6,424) | 0,167 |
| Calculadora de riesgo | 0,575 | 1,776  (1,391-2,269) | < 0,001 | 0,350 | 1,419  (1,306-1,542) | < 0,001 |

IMC: Índice masas corporal.

EPAGE I-A: solicitud de colonoscopia considerada como apropiada o indeterminada
